# Supplementary material
Source: publisher figshare collection journal article supplement (https://tandf.figshare.com/ndownloader/files/39646119)
Supplement: Supplementary file 1 [file 39646119]

# Rallying around the unwaved flag. National identity and Sweden's controversial Covid strategy

Gina Gustavsson and Jonas Larsson Taghizadeh  
Department of Government, Uppsala University, Sweden

## Online Appendices

### A. Variable descriptions

Table 4: Variable descriptions for the main variables

| Variables                  | Explanation                                                                                                                                                                                                                                                                                                                                                                                                                                  | Mean  | Std Dev |
|----------------------------|----------------------------------------------------------------------------------------------------------------------------------------------------------------------------------------------------------------------------------------------------------------------------------------------------------------------------------------------------------------------------------------------------------------------------------------------|-------|---------|
| Confidence corona response | How much confidence do you have in the Swedish authorities' handling of the spread of the coronavirus in Sweden?<br>(0-4, 0=Very low, 4=Very high)                                                                                                                                                                                                                                                                                           | 1.996 | 1.219   |
| Lockdown narrative index   | The degree to which the respondents agree that closing down society (lockdowns) is:<br>-undemocratic and authoritarian<br>-unnecessary in Sweden<br>-detrimental to the country's economy<br>-dangerous to mental health<br>-devastating to those who are abused in the home<br>(0-4, 0=strongly disagrees, 4=strongly agrees)                                                                                                               | 2.364 | 0.667   |
| Uncritical patriotism      | The degree to which the respondents disagree with the following:<br>-There are certain things about today's Sweden that I feel ashamed of<br>-People should support their country even if the country is doing wrong (reverse)<br>-I am often less proud of Sweden than I would like to be<br>-The world would be a better place if Swedes acknowledged Sweden's mistakes and shortcomings<br>(0-4, 0=strongly agrees, 4=strongly disagrees) | 1.478 | 0.638   |
| National chauvinism        | The degree to which the respondents agree with the following statements:<br>-I would rather live in Sweden than in any other country in the world                                                                                                                                                                                                                                                                                            | 2.448 | 0.795   |

|                              |                                                                                                                                                                                                                            |       |       |
|------------------------------|----------------------------------------------------------------------------------------------------------------------------------------------------------------------------------------------------------------------------|-------|-------|
|                              | -The world would be better if people in other countries were more like Swedes<br>-Sweden is a better country than most other countries.<br>(0-4, 0=strongly disagrees, 4=strongly agrees)                                  |       |       |
| Institutional national pride | The degree to which the respondents are proud of:<br>-The way democracy works in Sweden<br>-Sweden's economic achievements<br>-The country's scientific and technological achievements<br>(0-3, 0=Not Proud, 3=Very proud) | 1.842 | 0.711 |
| National pride               | The degree to which the respondents are proud of being Swedish<br>(0-3, 0=Not Proud, 3=Very proud)                                                                                                                         | 2.042 | 0.896 |
| National attachment          | The degree to which the respondents feel close to Sweden<br>(0-3, 0=not close at all 3=Very close)                                                                                                                         | 2.064 | 0.797 |
| Ethnic nationhood            | How important the respondents think the following is for someone to be truly Swedish:<br>-being born in Sweden<br>-having Swedish ancestors<br>(0-3, 0=Not very important, 3=Very important)                               | 1.119 | 0.954 |
| Individualism                | Prioritizing freedom over safety, self-realization over duties, independence over getting help, and autonomy over community (0-4, 0=prioritizing the latter in all four cases 4=prioritizing the former in all cases)      | 1.885 | 1.182 |
| Interpersonal trust          | Do you think that most people can be trusted or do you think that you cannot be too careful in dealing with other people? (0-10, 0=you cannot be too careful, 10=most people can be trusted)                               | 6.299 | 2.644 |
| Voted left                   | Whether or not the respondent voted for left-leaning parties (Greens, social democrats or the left party) in the previous (2018) election                                                                                  | 0.421 | 0.494 |

\*Unstandardized means and Std Dev.

*Table 5: Variable descriptions for variables that are only included in the appendix*

| <b>Variables</b>          | <b>Explanation</b>                                                                                                                                                                                                                                                            | <b>Mean*</b> | <b>Std Dev*</b> |
|---------------------------|-------------------------------------------------------------------------------------------------------------------------------------------------------------------------------------------------------------------------------------------------------------------------------|--------------|-----------------|
| Confidence in government  | How much or little trust/confidence do you have in the following actors:<br>-The government<br>(0-4, 0=strongly disagrees, 4=strongly agrees)                                                                                                                                 | 1.829        | 1.249           |
| Confidence in PHA         | How much or little trust/confidence do you have in the following actors:<br>-The Public Health Agency<br>(0-4, 0=strongly disagrees, 4=strongly agrees)                                                                                                                       | 2.219        | 1.177           |
| Civicness                 | How important the respondent think the following is for someone to be truly Swedish:<br>-Being a Swedish citizen<br>-Able to speak Swedish<br>-Respecting the Swedish way of governance and its laws<br>(0-3, 0=Not very important, 3=Very important)                         | 2.503        | 0.557           |
| Risk aversion             | The degree to which the respondents agree that it is important that public officials in crises play it safe and avoid risks<br>(0-4, 0=strongly disagrees, 4=strongly agrees)                                                                                                 | 3.032        | 0.850           |
| Health anxiety            | How concerned are you that each of the following options could occur as a result of COVID 19 (coronavirus) pandemic?<br>-That I could get seriously ill or die<br>-That my friends or my family could get seriously ill or die<br>(0-4, 0=not worried at all, 4=very worried) | 1.944        | 1.190           |
| Economic anxiety          | How concerned are you that each of the following options could occur as a result of COVID 19 (coronavirus) pandemic?<br>-That my finances will be hit hard                                                                                                                    | 1.677        | 1.315           |
| Potential risk group      | Which, if any, of the following diagnoses have you received<br>-Asthma<br>-Cancer<br>-Diabetes<br>-HIV/AIDS<br>-Heart disease<br>-Stroke<br>(0,1, 0=none, 1=at least of the diagnoses)                                                                                        | 0.192        | 0.394           |
| Health problem/disability | Are your daily activities limited/hindered by a health problem or a disability that has                                                                                                                                                                                       | 0.350        | 0.478           |

|  |                                                                             |  |  |
|--|-----------------------------------------------------------------------------|--|--|
|  | lasted or is expected to last for at least 12 months?<br>(0,1, 0=no, 1=yes) |  |  |
|--|-----------------------------------------------------------------------------|--|--|

\*Unstandardized means and Std Dev

## B. National identity in Sweden and in the EU.

*Table 6: Different dimensions of national identity*

|                                    | Swedish average | EU average |
|------------------------------------|-----------------|------------|
| National attachment (0-3)          | 1.955           | 1.993      |
| National pride (0-3)               | 2.259           | 2.279      |
| National chauvinism (0-4)          | 2.311           | 2.235      |
| Uncritical patriotism (0-4)        | 1.600           | 1.583      |
| Ethnic nationhood (0-3)            | 1.094           | 1.809      |
| Institutional national pride (0-3) | 2.033           | 1.493      |

\*Means. The variables in this table are based on the same statements/questions as in our empirical analysis.

Data from ISSP 2013

## C. Description of the sampling procedure

Quota sampling was used to get a representative sample of the Swedish population in terms of gender, age, location and political party preference. In other words, the panel was segmented in mutually exclusive sub-groups and members were selected from each segment based on the characteristics of the population and the total sample size. After obtaining enough answers from a certain group (e.g., women 50+ years old) the group was closed and the survey as a whole was completed once all groups/quotas were filled. By using this type of sampling, we handle the well-known problem with low and declining response rates that plagues survey-based research all over the world today. Given the low response rate in certain groups (e.g.,

among young males), random sampling could have resulted in a less representative sample overall. Using quota sampling, Yougov have succeeded in predicting election results with very high precision in many countries, such as England, the USA and Denmark (Yougov 2021).

## References:

Yougov. (2021). *Om onlinepaneler och tillförlitligheten*. Available online at: <https://yougov.se/news/2015/08/21/om-onlinepaneler-och-tillforlitligheten/>

## D. Comparison between our sample and the Swedish population

*Table 7: Comparison between our sample and the Swedish population*

| Characteristics                 | Sample | Sweden 2020 |
|---------------------------------|--------|-------------|
| Women                           | 55 %   | 50 %        |
| 18-24 years                     | 7 %    | 12 %        |
| 25-34 years                     | 15 %   | 16%         |
| 35-44 years                     | 16 %   | 16%         |
| 45-54 years                     | 18 %   | 17%         |
| 55-64 years                     | 16 %   | 15%         |
| 65+ years                       | 27 %   | 25%         |
| Foreign background              | 15 %   | 26 %        |
| Higher education                | 64 %   | 41 %        |
| Voted left-leaning parties 2018 | 42 %   | 41 %        |
| Region: Stockholm (capital)     | 22 %   | 22 %        |
| Region: North-Mid Sweden        | 18 %   | 18 %        |
| Region: Northern Sweden         | 11 %   | 12 %        |
| Region: South-Mid Sweden        | 31 %   | 30 %        |
| Region: South Sweden            | 18 %   | 18 %        |

## E. Effects of background characteristics

Table 8: Effects of background characteristics on confidence in the Swedish corona response, the Swedish lockdown narrative index and confidence in government (OLS, unstandardized variables)

|                                              | Confidence corona<br>response<br>(0-4) |                     | Lockdown narrative<br>index<br>(0-4) |                      | Confidence in<br>Government<br>(0-4) |                     |
|----------------------------------------------|----------------------------------------|---------------------|--------------------------------------|----------------------|--------------------------------------|---------------------|
|                                              | (1)                                    | (2)                 | (3)                                  | (4)                  | (5)                                  | (6)                 |
| Woman<br>(0,1)                               | 0.228***<br>(0.055)                    | 0.133*<br>(0.057)   | 0.058 <sup>+</sup><br>(0.030)        | 0.076*<br>(0.033)    | 0.399***<br>(0.056)                  | 0.237***<br>(0.054) |
| Age category<br>(0-5)                        | 0.017<br>(0.017)                       | 0.025<br>(0.018)    | -0.055***<br>(0.009)                 | -0.058***<br>(0.010) | 0.016<br>(0.017)                     | 0.023<br>(0.017)    |
| Higher education<br>(0,1)                    | 0.009<br>(0.058)                       | 0.040<br>(0.059)    | 0.019<br>(0.031)                     | 0.023<br>(0.034)     | 0.046<br>(0.059)                     | 0.069<br>(0.056)    |
| Foreign background<br>(0,1)                  | -0.088<br>(0.077)                      | -0.164*<br>(0.080)  | -0.115**<br>(0.042)                  | -0.157***<br>(0.046) | 0.015<br>(0.078)                     | -0.060<br>(0.076)   |
| Voted for left-leaning<br>parties 2018 (0,1) |                                        | 0.878***<br>(0.057) |                                      | 0.105**<br>(0.033)   |                                      | 1.258***<br>(0.054) |
| Constant                                     | 2.829***<br>(0.076)                    | 2.518**<br>(0.083)  | 2.509***<br>(0.042)                  | 2.481***<br>(0.047)  | 1.530***<br>(0.078)                  | 1.099***<br>(0.079) |
| Party controls                               | No                                     | Yes                 | No                                   | Yes                  | No                                   | Yes                 |
| N                                            | 1994                                   | 1698                | 1970                                 | 1676                 | 1983                                 | 1693                |
| adj. R <sup>2</sup>                          | 0.008                                  | 0.131               | 0.021                                | 0.034                | 0.024                                | 0.261               |

Notes. <sup>+</sup>  $p < .10$ , \*  $p < .05$ , \*\*  $p < .01$ , \*\*\*  $p < .001$ .

## F. Correlation matrix on the national identity variables

Table 9: Correlation matrix

|                              | Uncritical patriotism | National chauvinism | National institutional pride | National pride | National attachment | Ethnic nationhood |
|------------------------------|-----------------------|---------------------|------------------------------|----------------|---------------------|-------------------|
| National chauvinism          | 0.317***              |                     |                              |                |                     |                   |
| Institutional national pride | 0.341***              | 0.460***            |                              |                |                     |                   |
| National pride               | 0.379***              | 0.460***            | 0.537***                     |                |                     |                   |
| National attachment          | 0.281***              | 0.372***            | 0.502***                     | 0.547***       |                     |                   |
| Ethnic nationhood            | -0.041 <sup>+</sup>   | 0.106***            | -0.202***                    | 0.034*         | 0.004               |                   |
| Civicness                    | -0.104***             | 0.152***            | 0.057*                       | 0.158***       | 0.161***            | 0.383***          |

Notes. <sup>+</sup>  $p < .10$ , \*  $p < .05$ , \*\*  $p < .01$ , \*\*\*  $p < .001$ .

## G. Cronbachs Alpha for the indices and alternative results when removing a deviant item

Table 10: Cronbachs Alpha for the indices

|                              | Cronbachs Alpha |
|------------------------------|-----------------|
| Lockdown narrative index     | 0.694           |
| National chauvinism          | 0.677           |
| Institutional national pride | 0.744           |
| Uncritical patriotism        | 0.529 (0.673*)  |
| Ethnic nationhood            | 0.400           |

\*Alpha when removing a deviant reversed item: People should support their country even if the country is doing wrong (reverse). Removing the deviant item does not affect the results regarding the uncritical patriotism index to a meaningful degree (see Table 11).

*Table 11: Results with the uncritical patriotism index without the deviant item (OLS, standardized variables)*

|                                                 | Confidence corona response<br>(0-4) |                     |                     | Lockdown narrative index<br>(0-4) |                     |                     | Confidence in Government<br>(0-4) |                     |                      |
|-------------------------------------------------|-------------------------------------|---------------------|---------------------|-----------------------------------|---------------------|---------------------|-----------------------------------|---------------------|----------------------|
|                                                 | (1)                                 | (2)                 | (3)                 | (4)                               | (5)                 | (6)                 | (7)                               | (8)                 | (6)                  |
| Uncritical patriotism<br>(0-1, 4 steps)         | 3.127***<br>(0.128)                 | 1.733***<br>(0.147) | 1.658***<br>(0.154) | 0.523***<br>(0.079)               | 0.095<br>(0.099)    | 0.167<br>(0.107)    | 3.198***<br>(0.130)               | 1.759***<br>(0.147) | 1.510***<br>(0.146)  |
| Constant                                        | 1.894***<br>(0.077)                 | 0.589***<br>(0.140) | 0.543**<br>(0.142)  | 2.353***<br>(0.047)               | 1.766***<br>(0.094) | 1.731***<br>(0.099) | 0.588***<br>(0.079)               | -0.464**<br>(0.140) | -0.467***<br>(0.135) |
| Background controls                             | Yes                                 | Yes                 | Yes                 | Yes                               | Yes                 | Yes                 | Yes                               | Yes                 | Yes                  |
| Controls for the other<br>explanatory variables | No                                  | Yes                 | Yes                 | No                                | Yes                 | Yes                 | No                                | Yes                 | Yes                  |
| Party controls                                  | No                                  | No                  | Yes                 | No                                | No                  | Yes                 | No                                | Yes                 | Yes                  |
| N                                               | 1976                                | 1382                | 1215                | 1955                              | 1369                | 1205                | 1968                              | 1373                | 1211                 |
| adj. R <sup>2</sup>                             | 0.237                               | 0.445               | 0.495               | 0.043                             | 0.126               | 0.140               | 0.252                             | 0.463               | 0.568                |

Notes. <sup>+</sup>  $p < .10$ , \*  $p < .05$ , \*\*  $p < .01$ , \*\*\*  $p < .001$ . All models include background controls for age, gender, education and foreign background. Controls for the other explanatory variables: national chauvinism, institutional national pride, national pride, national attachment, ethnic nationhood, individualism, interpersonal trust. Party controls: voted for left leaning parties.



## H. Effects on confidence in the government and the PHA

Table 12: Effects on confidence in the government and the PHA (OLS, standardized variables)

|                                                | Confidence<br>government<br>(0-1, 5 steps) |                      | Confidence<br>PHA<br>(0-1, 5 steps) |                      |
|------------------------------------------------|--------------------------------------------|----------------------|-------------------------------------|----------------------|
|                                                | (1)                                        | (2)                  | (2)                                 | (3)                  |
| Uncritical patriotism<br>(0-1, 4 steps)        | 0.504***<br>(0.045)                        | 0.419***<br>(0.044)  | 0.423***<br>(0.043)                 | 0.414***<br>(0.045)  |
| National chauvinism<br>(0-1, 4 steps)          | 0.122**<br>(0.039)                         | 0.083*<br>(0.039)    | 0.116**<br>(0.038)                  | 0.082*<br>(0.040)    |
| Institutional national<br>pride (0-1, 3 steps) | 0.412***<br>(0.038)                        | 0.331***<br>(0.037)  | 0.343***<br>(0.036)                 | 0.286***<br>(0.038)  |
| National pride<br>(0-1, 3 steps)               | 0.025<br>(0.029)                           | 0.043<br>(0.028)     | 0.061*<br>(0.028)                   | 0.066*<br>(0.029)    |
| National attachment<br>(0-1, 3 steps)          | -0.013<br>(0.031)                          | -0.018<br>(0.030)    | 0.021<br>(0.030)                    | 0.043<br>(0.031)     |
| Ethnic nationhood<br>(0-1, 3 steps)            | -0.090***<br>(0.022)                       | -0.070**<br>(0.021)  | -0.078***<br>(0.021)                | -0.077***<br>(0.022) |
| Individualism<br>(0-1, 4 steps)                | -0.083***<br>(0.022)                       | -0.064**<br>(0.021)  | -0.060**<br>(0.021)                 | -0.033<br>(0.022)    |
| Interpersonal trust<br>(0-1, 10 steps)         | 0.240***<br>(0.027)                        | 0.241***<br>(0.026)  | 0.208***<br>(0.026)                 | 0.228***<br>(0.027)  |
| Constant                                       | -0.136***<br>(0.035)                       | -0.135***<br>(0.034) | 0.024<br>(0.034)                    | 0.025<br>(0.035)     |
| Background controls                            | Yes                                        | Yes                  | Yes                                 | Yes                  |
| Party controls                                 | No                                         | Yes                  | No                                  | Yes                  |
| N                                              | 1368                                       | 1207                 | 1374                                | 1210                 |
| adj. R <sup>2</sup>                            | 0.457                                      | 0.563                | 0.416                               | 0.456                |

Notes. <sup>+</sup>  $p < .10$ , \*  $p < .05$ , \*\*  $p < .01$ , \*\*\*  $p < .001$ . All models include background controls for age, gender, education and foreign background. Party controls: voted for left leaning parties.

## **I. Support for different dimensions of national identity in Sweden in ISSP 2013 and our sample from 2021**

*Table 13: Support for different dimensions of national identity in Sweden in ISSP 2013 and our sample from 2021*

|                                    | Sweden (ISSP 2013) | Sweden (our data 2021) |
|------------------------------------|--------------------|------------------------|
| National attachment (0-3)          | 1.955              | 2.064                  |
| National pride (0-3)               | 2.259              | 2.042                  |
| National chauvinism (0-4)          | 2.311              | 2.448                  |
| Uncritical patriotism (0-4)        | 1.600              | 1.478                  |
| Ethnic nationhood (0-3)            | 1.094              | 1.119                  |
| Institutional national pride (0-3) | 2.033              | 1.843                  |

\*Means. The variables in this table are based on the same statements/questions as in our empirical analysis.

## J. Results with unstandardized variables

Table 14: Effects of different dimensions of national identity on overall confidence in the Swedish corona response with unstandardized variables (OLS)

|                                    | Confidence corona response<br>(0-4) |                     |                     |                     |                     |                      |                      |                     |
|------------------------------------|-------------------------------------|---------------------|---------------------|---------------------|---------------------|----------------------|----------------------|---------------------|
|                                    | (1)                                 | (2)                 | (3)                 | (4)                 | (5)                 | (6)                  | (7)                  | (8)                 |
| Uncritical patriotism (0-4)        | 0.929***<br>(0.038)                 |                     |                     |                     |                     |                      |                      |                     |
| National chauvinism (0-4)          |                                     | 0.571***<br>(0.032) |                     |                     |                     |                      |                      |                     |
| Institutional national pride (0-3) |                                     |                     | 0.975***<br>(0.035) |                     |                     |                      |                      |                     |
| National pride (0-3)               |                                     |                     |                     | 0.599***<br>(0.029) |                     |                      |                      |                     |
| National attachment (0-3)          |                                     |                     |                     |                     | 0.518***<br>(0.034) |                      |                      |                     |
| Ethnic nationhood (0-3)            |                                     |                     |                     |                     |                     | -0.215***<br>(0.030) |                      |                     |
| Individualism (0-4)                |                                     |                     |                     |                     |                     |                      | -0.158***<br>(0.025) |                     |
| Interpersonal trust (0-10)         |                                     |                     |                     |                     |                     |                      |                      | 0.189***<br>(0.010) |
| Constant                           | 1.603***<br>(0.084)                 | 1.359***<br>(0.109) | 1.172***<br>(0.096) | 1.711***<br>(0.092) | 1.872***<br>(0.098) | 3.134***<br>(0.088)  | 3.147***<br>(0.095)  | 1.787***<br>(0.087) |
| Background controls                | Yes                                 | Yes                 | Yes                 | Yes                 | Yes                 | Yes                  | Yes                  | Yes                 |
| N                                  | 1970                                | 1975                | 1714                | 1850                | 1904                | 1907                 | 1995                 | 1990                |
| adj. R <sup>2</sup>                | 0.236                               | 0.145               | 0.314               | 0.192               | 0.117               | 0.033                | 0.031                | 0.171               |

Notes. +  $p < .10$ , \*  $p < .05$ , \*\*  $p < .01$ , \*\*\*  $p < .001$ . All models include background controls for age, gender, education and foreign background

Table 15: Effects of different dimensions of national identity on the Swedish lockdown narrative index with unstandardized variables (OLS)

|                                       | Lockdown narrative index<br>(0-4) |                     |                     |                     |                     |                     |                     |                     |
|---------------------------------------|-----------------------------------|---------------------|---------------------|---------------------|---------------------|---------------------|---------------------|---------------------|
|                                       | (1)                               | (2)                 | (3)                 | (4)                 | (5)                 | (6)                 | (7)                 | (8)                 |
| Uncritical patriotism<br>(0-4)        | 0.165***<br>(0.023)               |                     |                     |                     |                     |                     |                     |                     |
| National chauvinism<br>(0-4)          |                                   | 0.190***<br>(0.018) |                     |                     |                     |                     |                     |                     |
| Institutional national<br>pride (0-3) |                                   |                     | 0.220***<br>(0.022) |                     |                     |                     |                     |                     |
| National pride<br>(0-3)               |                                   |                     |                     | 0.208***<br>(0.017) |                     |                     |                     |                     |
| National attachment<br>(0-3)          |                                   |                     |                     |                     | 0.125***<br>(0.019) |                     |                     |                     |
| Ethnic nationhood<br>(0-3)            |                                   |                     |                     |                     |                     | -0.021<br>(0.016)   |                     |                     |
| Individualism index<br>(0-4)          |                                   |                     |                     |                     |                     |                     | -0.014<br>(0.013)   |                     |
| Interpersonal trust<br>(0-10)         |                                   |                     |                     |                     |                     |                     |                     | 0.046***<br>(0.006) |
| Constant                              | 2.290***<br>(0.052)               | 2.028***<br>(0.062) | 2.146***<br>(0.060) | 2.121***<br>(0.053) | 2.299***<br>(0.056) | 2.554***<br>(0.048) | 2.545***<br>(0.052) | 2.256***<br>(0.052) |
| Background controls                   | Yes                               | Yes                 | Yes                 | Yes                 | Yes                 | Yes                 | Yes                 | Yes                 |
| N                                     | 1950                              | 1954                | 1696                | 1826                | 1884                | 1888                | 1776                | 1990                |
| adj. R <sup>2</sup>                   | 0.045                             | 0.073               | 0.077               | 0.095               | 0.042               | 0.022               | 0.023               | 0.054               |

Notes. <sup>+</sup>  $p < .10$ , \*  $p < .05$ , \*\*  $p < .01$ , \*\*\*  $p < .001$ . All models include background controls for age, gender, education and foreign background

*Table 16: Effects on confidence in the Swedish corona response and the Swedish lockdown narrative index when including all the explanatory variables with unstandardized variables (OLS)*

|                                       | Confidence corona<br>response<br>(0-4) |                     | Lockdown narrative<br>index<br>(0-4) |                               |
|---------------------------------------|----------------------------------------|---------------------|--------------------------------------|-------------------------------|
|                                       | (1)                                    | (2)                 | (2)                                  | (3)                           |
| Uncritical patriotism<br>(0-4)        | 0.527***<br>(0.044)                    | 0.490***<br>(0.046) | 0.045<br>(0.030)                     | 0.062 <sup>+</sup><br>(0.032) |
| National chauvinism<br>(0-4)          | 0.105**<br>(0.039)                     | 0.058<br>(0.041)    | 0.067*<br>(0.026)                    | 0.083**<br>(0.028)            |
| Institutional national<br>pride (0-3) | 0.564***<br>(0.050)                    | 0.497***<br>(0.052) | 0.092**<br>(0.034)                   | 0.092*<br>(0.036)             |
| National pride<br>(0-3)               | 0.117**<br>(0.039)                     | 0.129**<br>(0.040)  | 0.135***<br>(0.026)                  | 0.122***<br>(0.028)           |
| National attachment<br>(0-3)          | -0.054<br>(0.041)                      | -0.032<br>(0.042)   | -0.030<br>(0.028)                    | -0.027<br>(0.029)             |
| Ethnic nationhood<br>(0-3)            | -0.043<br>(0.029)                      | -0.021<br>(0.030)   | 0.020<br>(0.019)                     | -0.013<br>(0.021)             |
| Individualism index<br>(0-4)          | -0.034<br>(0.022)                      | -0.014<br>(0.022)   | 0.020<br>(0.015)                     | 0.024<br>(0.016)              |
| Interpersonal trust<br>(0-10)         | 0.093***<br>(0.011)                    | 0.098***<br>(0.011) | 0.025***<br>(0.007)                  | 0.023**<br>(0.008)            |
| Constant                              | 0.412**<br>(0.143)                     | 0.365*<br>(0.146)   | 1.728***<br>(0.096)                  | 1.694***<br>(0.101)           |
| Background controls                   | Yes                                    | Yes                 | Yes                                  | Yes                           |
| Party controls                        | No                                     | Yes                 | No                                   | Yes                           |
| N                                     | 1377                                   | 1211                | 1365                                 | 1202                          |
| adj. R <sup>2</sup>                   | 0.447                                  | 0.493               | 0.127                                | 0.141                         |

Notes. <sup>+</sup>  $p < .10$ , \*  $p < .05$ , \*\*  $p < .01$ , \*\*\*  $p < .001$ . All models include background controls for age, gender, education and foreign background. Party controls: voted for left leaning parties.

## K. Results with binary dependent variables and logistic regression

Table 17: Effects of different dimensions of national identity on overall confidence in the Swedish corona response (Logit, standardized variables 0,1)

|                                             | Confidence corona response dummy<br>(0,1) |                      |                      |                      |                      |                      |                      |                      |
|---------------------------------------------|-------------------------------------------|----------------------|----------------------|----------------------|----------------------|----------------------|----------------------|----------------------|
|                                             | (1)                                       | (2)                  | (3)                  | (4)                  | (5)                  | (6)                  | (7)                  | (8)                  |
| Uncritical patriotism (0-1, 4 steps)        | 8.147***<br>(0.474)                       |                      |                      |                      |                      |                      |                      |                      |
| National chauvinism (0-1, 4 steps)          |                                           | 4.107***<br>(0.312)  |                      |                      |                      |                      |                      |                      |
| Institutional national pride (0-1, 3 steps) |                                           |                      | 6.259***<br>(0.372)  |                      |                      |                      |                      |                      |
| National pride (0-1, 3 steps)               |                                           |                      |                      | 3.390***<br>(0.224)  |                      |                      |                      |                      |
| National attachment (0-1, 3 steps)          |                                           |                      |                      |                      | 2.727***<br>(0.227)  |                      |                      |                      |
| Ethnic nationhood (0-1, 3 steps)            |                                           |                      |                      |                      |                      | -1.177***<br>(0.174) |                      |                      |
| Individualism (0-1, 4 steps)                |                                           |                      |                      |                      |                      |                      | -1.184***<br>(0.192) |                      |
| Interpersonal trust (0-1, 10 steps)         |                                           |                      |                      |                      |                      |                      |                      | 3.617***<br>(0.239)  |
| Constant                                    | -2.672***<br>(0.227)                      | -2.859***<br>(0.263) | -3.804***<br>(0.301) | -2.321***<br>(0.230) | -1.850***<br>(0.216) | 0.399*<br>(0.171)    | 0.411*<br>(0.188)    | -1.817***<br>(0.199) |
| Background controls                         | Yes                                       | Yes                  | Yes                  | Yes                  | Yes                  | Yes                  | Yes                  | Yes                  |
| N                                           | 1501                                      | 1504                 | 1337                 | 1430                 | 1475                 | 1471                 | 1366                 | 1516                 |
| Pseudo R <sup>2</sup>                       | 0.217                                     | 0.114                | 0.261                | 0.161                | 0.094                | 0.032                | 0.032                | 0.171                |

Notes. +  $p < .10$ , \*  $p < .05$ , \*\*  $p < .01$ , \*\*\*  $p < .001$ . Confidence corona response dummy=1 if confidence is high or very high, 0 if confidence is low or very low. All models include background controls for age, gender, education and foreign background

*Table 18: Effects of different dimensions of national identity on the Swedish lockdown narrative index dummy (Logit, standardized variables 0,1)*

|                                             | Lockdown narrative index dummy<br>(0,1) |                     |                     |                     |                     |                     |                     |                     |
|---------------------------------------------|-----------------------------------------|---------------------|---------------------|---------------------|---------------------|---------------------|---------------------|---------------------|
|                                             | (1)                                     | (2)                 | (3)                 | (4)                 | (5)                 | (6)                 | (7)                 | (8)                 |
| Uncritical patriotism (0-1, 4 steps)        | 3.209***<br>(0.382)                     |                     |                     |                     |                     |                     |                     |                     |
| National chauvinism (0-1, 4 steps)          |                                         | 2.041***<br>(0.287) |                     |                     |                     |                     |                     |                     |
| Institutional national pride (0-1, 3 steps) |                                         |                     | 2.122***<br>(0.261) |                     |                     |                     |                     |                     |
| National pride (0-1, 3 steps)               |                                         |                     |                     | 1.970***<br>(0.200) |                     |                     |                     |                     |
| National attachment (0-1, 3 steps)          |                                         |                     |                     |                     | 1.044***<br>(0.219) |                     |                     |                     |
| Ethnic nationhood (0-1, 3 steps)            |                                         |                     |                     |                     |                     | -0.528**<br>(0.184) |                     |                     |
| Individualism (0-1, 4 steps)                |                                         |                     |                     |                     |                     |                     | -0.261<br>(0.209)   |                     |
| Interpersonal trust (0-1, 10 steps)         |                                         |                     |                     |                     |                     |                     |                     | 1.541***<br>(0.216) |
| Constant                                    | 0.683**<br>(0.203)                      | 0.345<br>(0.243)    | 0.424+<br>(0.236)   | 0.483*<br>(0.212)   | 1.047***<br>(0.214) | 1.855***<br>(0.196) | 1.771***<br>(0.215) | 0.983***<br>(0.193) |
| Background controls                         | Yes                                     | Yes                 | Yes                 | Yes                 | Yes                 | Yes                 | Yes                 | Yes                 |
| N                                           | 1675                                    | 1678                | 1466                | 1578                | 1631                | 1634                | 1530                | 1689                |
| Pseudo R <sup>2</sup>                       | 0.064                                   | 0.052               | 0.064               | 0.078               | 0.036               | 0.027               | 0.024               | 0.051               |

Notes. +  $p < .10$ , \*  $p < .05$ , \*\*  $p < .01$ , \*\*\*  $p < .001$ . Lockdown narrative index dummy=1 if the respondents on average strongly agrees or agrees with the statements ( $>2$ ), 0= if the respondents on average strongly disagrees or disagrees with the statements ( $<2$ ). All models include background controls for age, gender, education and foreign background

Table 19: Effects on confidence in the Swedish corona response dummy and the Swedish lockdown narrative index dummy when including all the explanatory variables (Logit, standardized variables 0,1)

|                                                | Confidence corona<br>response<br>(0,1) |                      | Lockdown narrative<br>index<br>(0,1) |                     |
|------------------------------------------------|----------------------------------------|----------------------|--------------------------------------|---------------------|
|                                                | (1)                                    | (2)                  | (2)                                  | (3)                 |
| Uncritical patriotism<br>(0-1, 4 steps)        | 6.233***<br>(0.661)                    | 6.340***<br>(0.754)  | 1.878***<br>(0.512)                  | 2.199***<br>(0.576) |
| National chauvinism<br>(0-1, 4 steps)          | 0.535<br>(0.527)                       | 0.203<br>(0.601)     | 0.367<br>(0.429)                     | 0.714<br>(0.472)    |
| Institutional national pride<br>(0-1, 3 steps) | 4.131***<br>(0.532)                    | 3.379***<br>(0.595)  | 0.947*<br>(0.413)                    | 0.959*<br>(0.458)   |
| National pride<br>(0-1, 3 steps)               | 1.334**<br>(0.395)                     | 1.791***<br>(0.459)  | 1.374***<br>(0.319)                  | 1.068***<br>(0.345) |
| National attachment<br>(0-1, 3 steps)          | -0.690<br>(0.423)                      | -0.607<br>(0.480)    | -0.760*<br>(0.344)                   | -0.663+<br>(0.372)  |
| Ethnic nationhood<br>(0-1, 3 steps)            | -0.523+<br>(0.293)                     | -0.313<br>(0.334)    | -0.206<br>(0.246)                    | -0.326<br>(0.271)   |
| Individualism<br>(0-1, 4 steps)                | -0.455<br>(0.292)                      | -0.107<br>(0.330)    | 0.243<br>(0.254)                     | 0.267<br>(0.274)    |
| Interpersonal trust<br>(0-1, 10 steps)         | 2.743***<br>(0.366)                    | 3.281***<br>(0.422)  | 0.699*<br>(0.295)                    | 0.648*<br>(0.322)   |
| Constant                                       | -6.118***<br>(0.561)                   | -6.918***<br>(0.658) | -0.456<br>(0.392)                    | -0.438<br>(0.423)   |
| Background controls                            | Yes                                    | Yes                  | Yes                                  | Yes                 |
| Party controls                                 | No                                     | Yes                  | No                                   | Yes                 |
| N                                              | 1097                                   | 969                  | 1189                                 | 1050                |
| Pseudo R <sup>2</sup>                          | 0.416                                  | 0.470                | 0.111                                | 0.120               |

Notes. +  $p < .10$ , \*  $p < .05$ , \*\*  $p < .01$ , \*\*\*  $p < .001$ . Confidence corona response dummy=1 if confidence is high or very high, 0 if confidence is low or very low. Lockdown narrative index dummy=1 if the respondents on average strongly agrees or agrees with the statements ( $>2$ ), 0= if the respondents on average strongly disagrees or disagrees with the statements ( $<2$ ). All models include background controls for age, gender, education and foreign background. Party controls: voted for left leaning parties.



## L. Interactions between health anxiety/concerns and the nationalism items on confidence in the corona response, lockdown narrative index and confidence in government

Table 20: Effects of the interaction between health anxiety/concerns and the nationalism items on confidence in the Swedish corona response (OLS, standardized variables 0,1)

|                         | Confidence corona response<br>(0-4) |                      |                     |                     |
|-------------------------|-------------------------------------|----------------------|---------------------|---------------------|
|                         | (1)                                 | (2)                  | (3)                 | (4)                 |
| Health anxiety          | 1.722***                            |                      |                     |                     |
| X Uncritical patriotism | (0.521)                             |                      |                     |                     |
| Health anxiety          |                                     | 1.136**              |                     |                     |
| X National chauvinism   |                                     | (0.412)              |                     |                     |
| Health anxiety          |                                     |                      | 0.121               |                     |
| X Instit national pride |                                     |                      | (0.373)             |                     |
| Health anxiety          |                                     |                      |                     | 0.193               |
| X national pride        |                                     |                      |                     | (0.295)             |
| Uncritical patriotism   | 0.984**<br>(0.311)                  | 1.790***<br>(0.192)  | 1.795***<br>(0.192) | 1.789**<br>(0.193)  |
| National chauvinism     | 0.311<br>(0.169)                    | -0.234<br>(0.255)    | 0.293+<br>(0.170)   | 0.298+<br>(0.170)   |
| Instit national pride   | 1.451***<br>(0.164)                 | 1.438***<br>(0.164)  | 1.378***<br>(0.249) | 1.445***<br>(0.165) |
| National pride          | 0.385**<br>(0.123)                  | 0.408**<br>(0.123)   | 0.402**<br>(0.124)  | 0.299<br>(0.196)    |
| Health anxiety          | -0.950***<br>(0.202)                | -1.064***<br>(0.273) | -0.432+<br>(0.249)  | -0.491*<br>(0.225)  |
| Constant                | 0.000<br>(0.179)                    | 0.181<br>(0.126)     | -0.263<br>(0.191)   | -0.237<br>(0.182)   |
| Background controls     | Yes                                 | Yes                  | Yes                 | Yes                 |
| Party controls          | Yes                                 | Yes                  | Yes                 | Yes                 |
| Additional controls     | Yes                                 | Yes                  | Yes                 | Yes                 |
| N                       | 1121                                | 1121                 | 1121                | 1121                |
| adj. R <sup>2</sup>     | 0.502                               | 0.500                | 0.497               | 0.497               |

Notes. +  $p < .10$ , \*  $p < .05$ , \*\*  $p < .01$ , \*\*\*  $p < .001$ . All models include background controls for age, gender, education and foreign background. Party controls: voted for left leaning parties. Additional controls: national attachment, ethnic nationhood, individualism, interpersonal trust

Table 21: Effects of the interaction between health anxiety/concerns and the nationalism items on the lockdown narrative index (OLS, standardized variables 0,1)

|                         | Lockdown narrative index |           |           |                    |
|-------------------------|--------------------------|-----------|-----------|--------------------|
|                         | (0-4)                    |           |           |                    |
|                         | (1)                      | (2)       | (3)       | (4)                |
| Health anxiety          | 1.440***                 |           |           |                    |
| X Uncritical patriotism | (0.360)                  |           |           |                    |
| Health anxiety          |                          | 0.807**   |           |                    |
| X National chauvinism   |                          | (0.286)   |           |                    |
| Health anxiety          |                          |           | 0.533*    |                    |
| X Instit national pride |                          |           | (0.259)   |                    |
| Health anxiety          |                          |           |           | 0.352 <sup>+</sup> |
| X national pride        |                          |           |           | (0.205)            |
| Uncritical patriotism   | -0.529*                  | 0.143     | 0.146     | 0.134              |
|                         | (0.215)                  | (0.133)   | (0.133)   | (0.134)            |
| National chauvinism     | 0.361                    | -0.028    | 0.353**   | 0.357**            |
|                         | (0.117)                  | (0.177)   | (0.118)   | (0.118)            |
| Instit national pride   | 0.255*                   | 0.245*    | -0.022    | 0.256*             |
|                         | (0.113)                  | (0.113)   | (0.172)   | (0.114)            |
| National pride          | 0.421***                 | 0.440***  | 0.448***  | 0.254 <sup>+</sup> |
|                         | (0.085)                  | (0.085)   | (0.086)   | (0.135)            |
| Health anxiety          | -0.529*                  | -0.882*** | -0.710*** | -0.624***          |
|                         | (0.215)                  | (0.190)   | (0.173)   | (0.157)            |
| Constant                | 2.145***                 | 2.132***  | 2.052***  | 2.007***           |
|                         | (0.124)                  | (0.136)   | (0.132)   | (0.126)            |
| Background controls     | Yes                      | Yes       | Yes       | Yes                |
| Party controls          | Yes                      | Yes       | Yes       | Yes                |
| Additional controls     | Yes                      | Yes       | Yes       | Yes                |
| N                       | 1113                     | 1113      | 1113      | 1113               |
| adj. R <sup>2</sup>     | 0.183                    | 0.177     | 0.174     | 0.173              |

Notes. <sup>+</sup>  $p < .10$ , \*  $p < .05$ , \*\*  $p < .01$ , \*\*\*  $p < .001$ . All models include background controls for age, gender, education and foreign background. Party controls: voted for left leaning parties. Additional controls: national attachment, ethnic nationhood, individualism, interpersonal trust

Table 22: Effects of the interaction between health anxiety/concerns and the nationalism items on confidence in the government (OLS, standardized variables 0,1)

|                         | Confidence government<br>(0-4) |                      |                     |                     |
|-------------------------|--------------------------------|----------------------|---------------------|---------------------|
|                         | (1)                            | (2)                  | (3)                 | (4)                 |
| Health anxiety          | 2.005***                       |                      |                     |                     |
| X Uncritical patriotism | (0.508)                        |                      |                     |                     |
| Health anxiety          |                                | 1.463***             |                     |                     |
| X National chauvinism   |                                | (0.402)              |                     |                     |
| Health anxiety          |                                |                      | 0.164               |                     |
| X Instit national pride |                                |                      | (0.365)             |                     |
| Health anxiety          |                                |                      |                     | 0.463               |
| X national pride        |                                |                      |                     | (0.288)             |
| Uncritical patriotism   | 0.688*<br>(0.304)              | 1.625<br>(0.187)     | 1.631***<br>(0.188) | 1.617***<br>(0.188) |
| National chauvinism     | 0.272<br>(0.165)               | -0.427+<br>(0.249)   | 0.252<br>(0.167)    | 0.265<br>(0.167)    |
| Instit national pride   | 1.209***<br>(0.159)            | 1.195***<br>(0.160)  | 1.114***<br>(0.243) | 1.210***<br>(0.161) |
| National pride          | 0.208+<br>(0.120)              | 0.236*<br>(0.120)    | 0.228+<br>(0.121)   | -0.013<br>(0.191)   |
| Health anxiety          | -0.825***<br>(0.198)           | -1.045***<br>(0.267) | -0.236<br>(0.243)   | -0.456*<br>(0.220)  |
| Constant                | 0.570**<br>(0.174)             | 0.655**<br>(0.192)   | 0.272<br>(0.187)    | 0.373*<br>(0.178)   |
| Background controls     | Yes                            | Yes                  | Yes                 | Yes                 |
| Party controls          | Yes                            | Yes                  | Yes                 | Yes                 |
| Additional controls     | Yes                            | Yes                  | Yes                 | Yes                 |
| N                       | 1121                           | 1121                 | 1121                | 1121                |
| adj. R <sup>2</sup>     | 0.461                          | 0.459                | 0.453               | 0.454               |

Notes. +  $p < .10$ , \*  $p < .05$ , \*\*  $p < .01$ , \*\*\*  $p < .001$ . All models include background controls for age, gender, education and foreign background. Party controls: voted for left leaning parties. Additional controls: national attachment, ethnic nationhood, individualism, interpersonal trust

## M. Results with additional controls

Table 23: Effects on confidence in the Swedish corona response and the Swedish lockdown narrative index when including all the explanatory variables and with additional controls for health/economic anxiety, risk aversion and health status (OLS, standardized variables 0-1)

|                                                | Confidence corona response<br>(0-4) |                      |                     | Lockdown narrative index<br>(0-4) |                      |                      |
|------------------------------------------------|-------------------------------------|----------------------|---------------------|-----------------------------------|----------------------|----------------------|
|                                                | (1)                                 | (2)                  | (3)                 | (4)                               | (5)                  | (6)                  |
| Uncritical patriotism<br>(0-1, 4 steps)        | 1.856***<br>(0.189)                 | 1.637***<br>(0.197)  | 1.570***<br>(0.257) | 0.112<br>(0.128)                  | 0.080<br>(0.137)     | 0.083<br>(0.178)     |
| National chauvinism<br>(0-1, 4 steps)          | 0.504**<br>(0.168)                  | 0.338+<br>(0.174)    | -0.063<br>(0.223)   | 0.327**<br>(0.113)                | 0.363**<br>(0.120)   | 0.464**<br>(0.154)   |
| Institutional national pride<br>(0-1, 3 steps) | 1.663***<br>(0.161)                 | 1.422***<br>(0.167)  | 1.769***<br>(0.225) | 0.265*<br>(0.109)                 | 0.269*<br>(0.116)    | 0.260+<br>(0.155)    |
| National pride<br>(0-1, 3 steps)               | 0.391**<br>(0.123)                  | 0.416**<br>(0.127)   | 0.406*<br>(0.163)   | 0.424***<br>(0.083)               | 0.398***<br>(0.088)  | 0.319**<br>(0.112)   |
| National attachment<br>(0-1, 3 steps)          | -0.199<br>(0.130)                   | -0.113<br>(0.133)    | -0.001<br>(0.172)   | -0.075<br>(0.088)                 | -0.070<br>(0.092)    | -0.038<br>(0.119)    |
| Ethnic nationhood<br>(0-1, 3 steps)            | -0.128<br>(0.091)                   | -0.074<br>(0.094)    | -0.012<br>(0.124)   | 0.056<br>(0.061)                  | 0.056<br>(0.065)     | 0.014<br>(0.085)     |
| Individualism<br>(0-1, 4 steps)                | -0.218*<br>(0.093)                  | -0.148<br>(0.095)    | -0.195<br>(0.123)   | 0.020<br>(0.063)                  | 0.035<br>(0.066)     | 0.100<br>(0.085)     |
| Interpersonal trust<br>(0-1, 10 steps)         | 0.896***<br>(0.114)                 | 0.922***<br>(0.117)  | 0.731***<br>(0.151) | 0.195*<br>(0.077)                 | 0.166*<br>(0.081)    | 0.115<br>(0.104)     |
| Risk aversion<br>(0-1, 4 steps)                | -0.498***<br>(0.131)                | -0.448***<br>(0.133) | -0.490**<br>(0.175) | -0.210*<br>(0.088)                | -0.232*<br>(0.092)   | -0.212+<br>(0.121)   |
| Health anxiety<br>(0-1, 4 steps)               | -0.165<br>(0.104)                   | -0.243*<br>(0.106)   | -0.237+<br>(0.140)  | -0.330***<br>(0.070)              | -0.382***<br>(0.074) | -0.371***<br>(0.097) |
| Economic anxiety<br>(0-1, 4 steps)             | -0.102<br>(0.094)                   | -0.159+<br>(0.096)   | -0.175<br>(0.129)   | 0.008<br>(0.064)                  | 0.019<br>(0.066)     | 0.143<br>(0.089)     |
| Voted left<br>(0,1)                            |                                     | 0.495***<br>(0.059)  | 0.489***<br>(0.079) |                                   | 0.015<br>(0.041)     | 0.023<br>(0.054)     |
| Potential risk group<br>(0,1)                  |                                     |                      | -0.015<br>(0.098)   |                                   |                      | -0.125+<br>(0.068)   |
| Health problem/disability<br>(0,1)             |                                     |                      | -0.063<br>(0.080)   |                                   |                      | 0.011<br>(0.055)     |
| Constant                                       | 0.108<br>(0.188)                    | 0.097<br>(0.191)     | 0.265<br>(0.246)    | 2.094***<br>(0.127)               | 2.089***<br>(0.132)  | 1.968***<br>(0.170)  |
| Background controls                            | Yes                                 | Yes                  | Yes                 | Yes                               | Yes                  | Yes                  |
| Party controls                                 | No                                  | Yes                  | Yes                 | No                                | Yes                  | Yes                  |
| Health status controls                         | No                                  | No                   | Yes                 | No                                | No                   | Yes                  |
| N                                              | 1239                                | 1092                 | 662                 | 1229                              | 1084                 | 657                  |
| adj. R <sup>2</sup>                            | 0.452                               | 0.500                | 0.487               | 0.148                             | 0.171                | 0.149                |

Notes. + $p < .10$ , \* $p < .05$ , \*\* $p < .01$ , \*\*\* $p < .001$ . All models include background controls for age, gender, education and foreign background. Party controls: voted for left leaning parties.
